# Supplementary material
Source: PubMed Central journal article supplement (PMC3522307)
Supplement: supp_M112.389742_jbc.M112.389742-1.pdf [file supp_M112.389742_jbc.M112.389742-1.pdf]

**Human IgA-binding Peptides Selected from Random Peptide Libraries: Affinity Maturation and Application in IgA Purification**

**Supplementary Figures**

**Takaaki Hatanaka<sup>1</sup>, Shinji Ohzono<sup>2</sup>, Mirae Park<sup>3</sup>, Shogo Tsukamoto<sup>1</sup>, Ryohei Sugita<sup>1</sup>, Kotaro Sakamoto<sup>1‡</sup>, Hiroyuki Ishitobi<sup>2</sup>, Toshiyuki Mori<sup>4§</sup>, Osamu Ito<sup>2</sup>, Koichi Sorajo<sup>2</sup>, Kazuhisa Sugimura<sup>1</sup>, Sihyun Ham<sup>3</sup>, and Yuji Ito<sup>1</sup>**

<sup>1</sup>From the Graduate School of Science and Engineering, Kagoshima University, Kagoshima 890-0065, Japan

<sup>2</sup>General Research Laboratory, Otsuka Chemical Co., Ltd., 771-0193, Japan

<sup>3</sup>Department of Chemistry, Sookmyung Women's University, Hyochangwon-gil 52, Yongsan-gu, Seoul 140-742, Korea

<sup>4</sup>Molecular Targets Development Program, Center for Cancer Research, National Cancer Institute, NCI-Frederick, Frederick, Maryland 21702, USA

<sup>‡</sup>Present address: Pharmaceutical Research Division, Frontier Research Laboratories, Takeda Pharmaceutical Company Limited, Tsukuba 300-4293, Japan

<sup>§</sup>Present address: Takeda San Francisco, Inc., 285 East Grand Ave. South San Francisco CA 94080-4804, USA

**Running head:** IgA-binding peptide

To whom correspondence may be addressed: Yuji Ito, Tel: +81-99-285-8110; Fax: +81-99-285-8110;

E-mail: [yito@sci.kagoshima-u.ac.jp](mailto:yito@sci.kagoshima-u.ac.jp)

To whom correspondence may be addressed: Sihyun Ham, Tel: +82-02-710-9410; Fax:

+82-02-2077-7321; E-mail: [sihyun@sookmyung.ac.kr](mailto:sihyun@sookmyung.ac.kr)

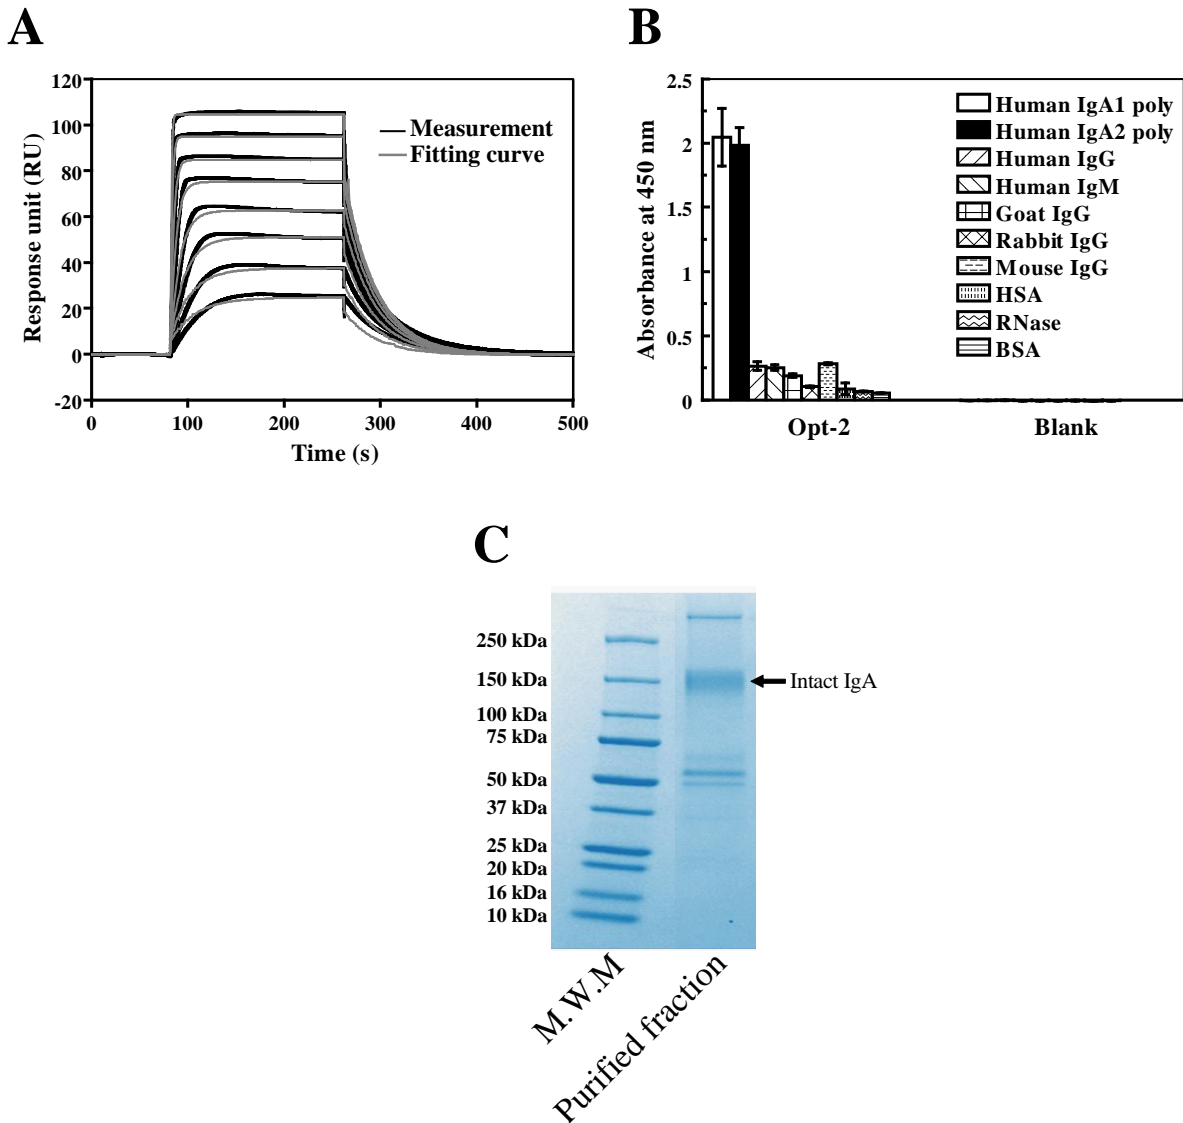

**Supplementary Figure 1. The characteristics of the Opt-2 peptide.**

A, sensorgram showing the binding between IgA2 immobilized on a CM5 sensor chip and the Opt-2 peptide. B, ELISA was performed to examine the binding specificity of Opt-2. Blank indicates measurement without the peptide. C, purification of IgA from human plasma using Opt-2 peptide-conjugated column. M.W.M indicates the molecular weight maker.

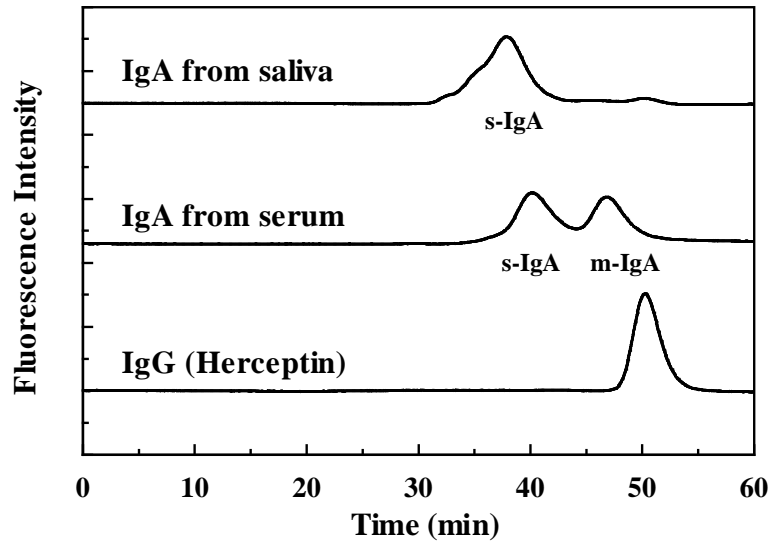

**Supplementary Figure 2. Size-exclusion chromatography of purified IgA.**

Size-exclusion chromatography was performed using Superdex 200 10/30 GL column (GE Healthcare) equilibrated with PBS (pH 7.4) at a flow rate of 0.25 mL/min. IgA purified from human serum and saliva using the A2 peptide-conjugated column was injected into the Superdex column. Protein elution was monitored by fluorescence emission at 350 nm after excitation with UV radiation at 280 nm.
